# Supplementary material
Source: PubMed Central journal article supplement (PMC3923901)
Supplement: NIHMS520349-supplement-1.pdf [file NIHMS520349-supplement-1.pdf]

# Supplementary Figure 1

## Binding of SACOL2570 to glycan array:

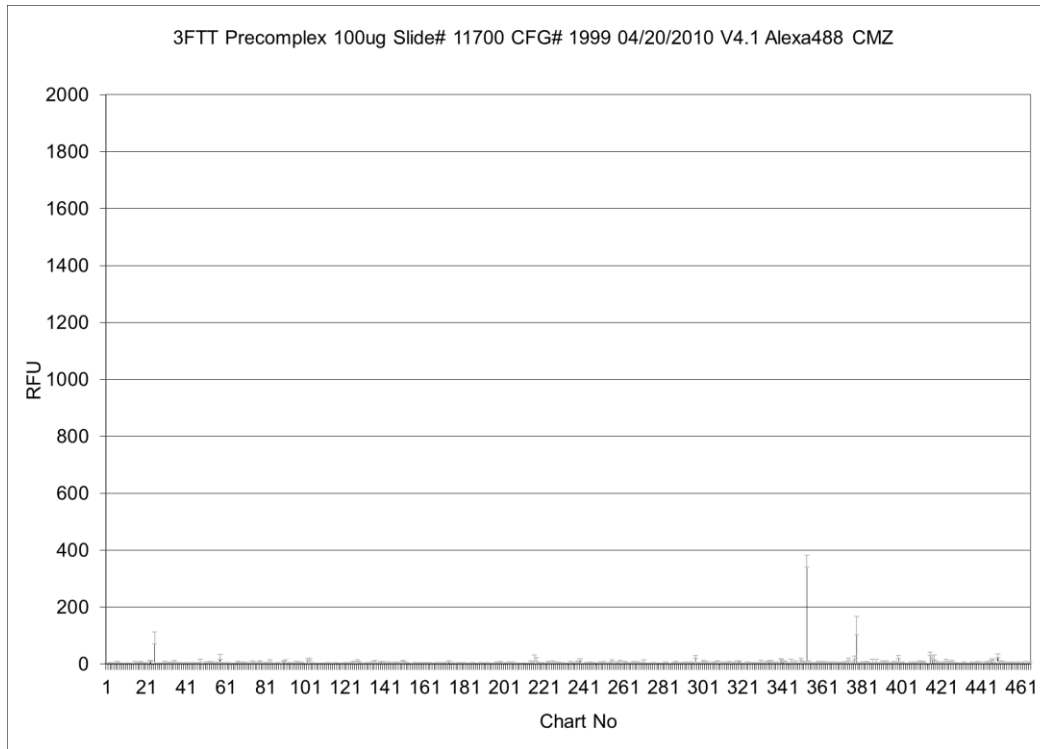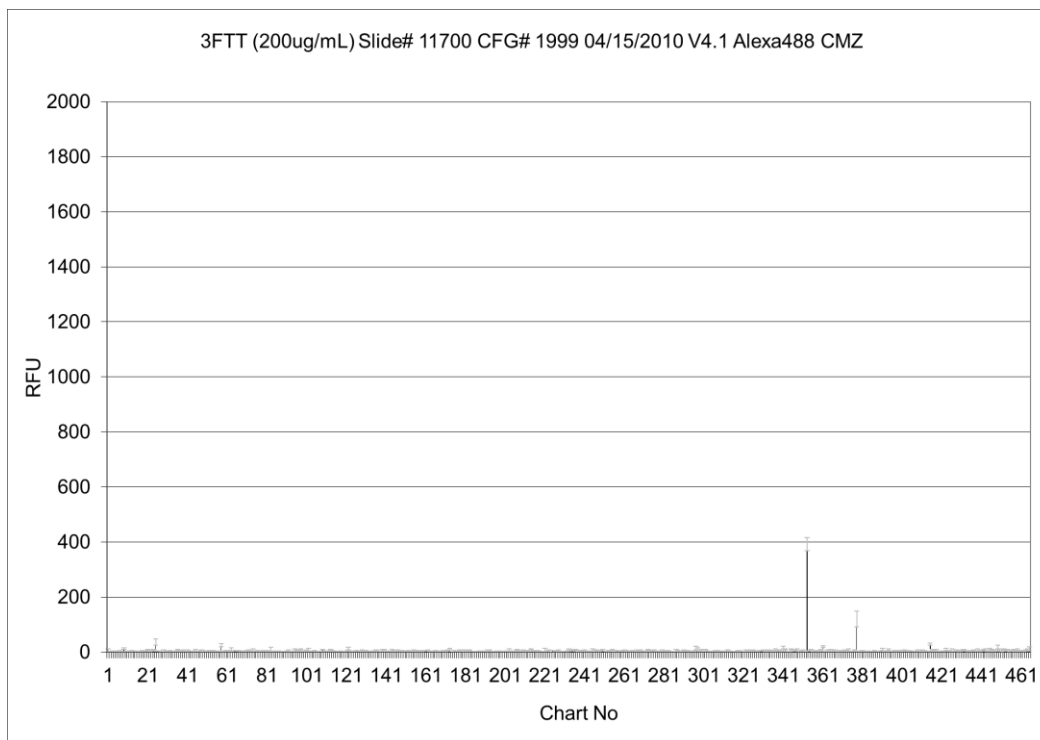

### Example of a strong binder:

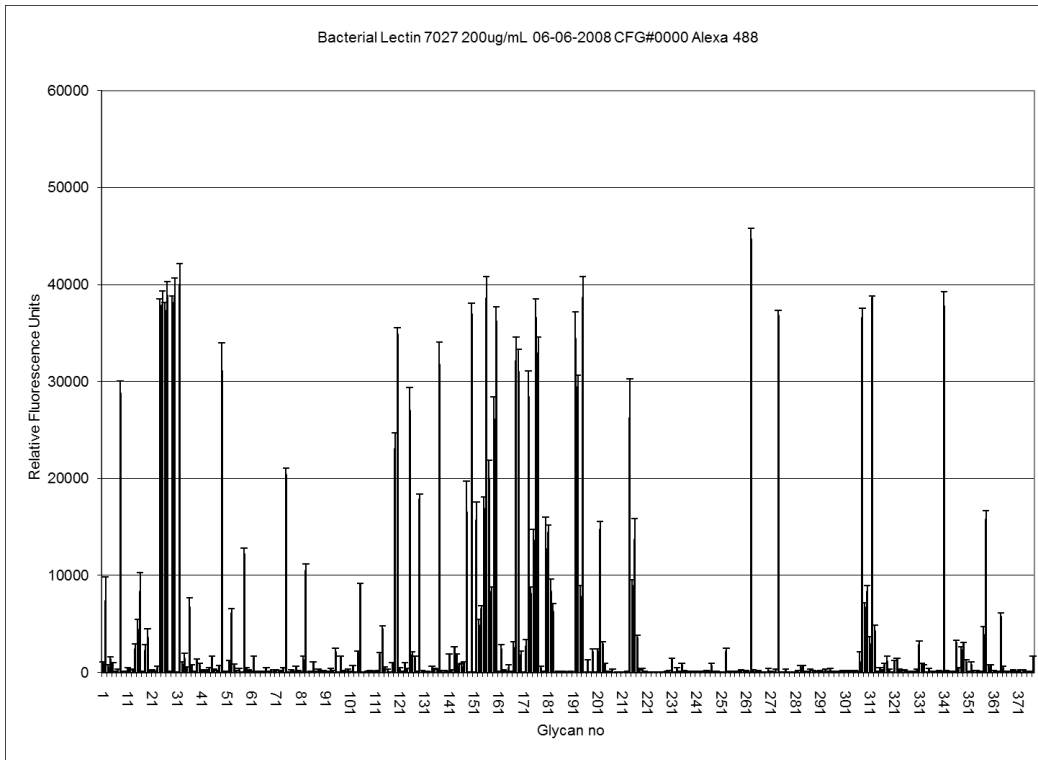

**Supplementary Figure 1** Fluorescence reading from glycoarray of 465 glycans for SACOL2570 (top and middle panels), and bacterial lectin as a positive control (bottom panel). No binding was detected for a tested pool of potential substrate compounds.

Supplementary Figure 2.

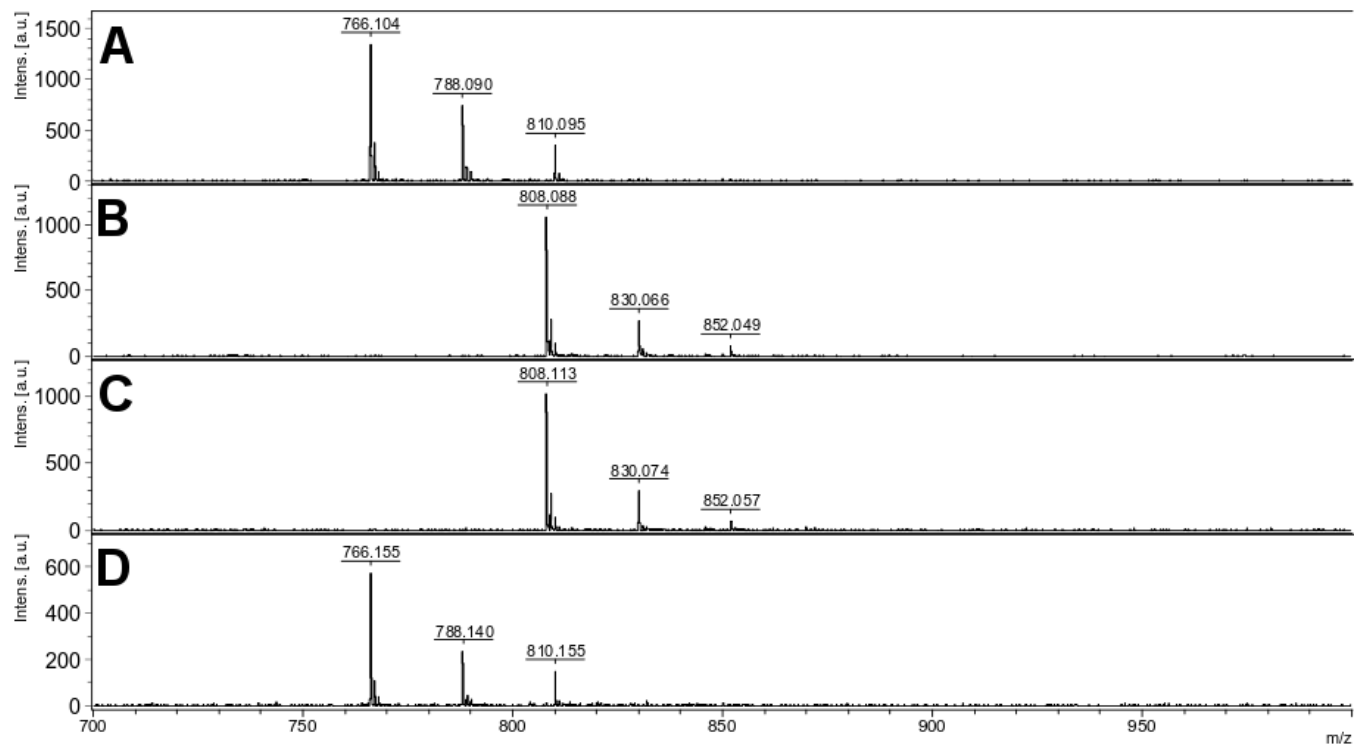

**Supplementary Figure 2** SACOL2570 catalyzes the hydrolysis of AcCoA to CoA in solution.

(A) MALDI-MS spectra of AcCoA incubated with SACOL2570, (B) AcCoA incubated in the absence of SACOL2570, (C) AcCoA alone, and (D) CoA alone.

Supplementary Table 1.

| Chart Number | Glycan Structure                                                                         |
|--------------|------------------------------------------------------------------------------------------|
| 1            | Gal $\alpha$ -Sp8                                                                        |
| 2            | Glc $\alpha$ -Sp8                                                                        |
| 3            | Man $\alpha$ -Sp8                                                                        |
| 4            | GalNAc $\alpha$ -Sp8                                                                     |
| 5            | GalNAc $\alpha$ -Sp15                                                                    |
| 6            | Fuc $\alpha$ -Sp8                                                                        |
| 7            | Fuc $\alpha$ -Sp9                                                                        |
| 8            | Rha $\alpha$ -Sp8                                                                        |
| 9            | Neu5Ac $\alpha$ -Sp8                                                                     |
| 10           | Neu5Ac $\alpha$ -Sp11                                                                    |
| 11           | Neu5Ac $\beta$ -Sp8                                                                      |
| 12           | Gal $\beta$ -Sp8                                                                         |
| 13           | Glc $\beta$ -Sp8                                                                         |
| 14           | Man $\beta$ -Sp8                                                                         |
| 15           | GalNAc $\beta$ -Sp8                                                                      |
| 16           | GlcNAc $\beta$ -Sp0                                                                      |
| 17           | GlcNAc $\beta$ -Sp8                                                                      |
| 18           | GlcN(Gc) $\beta$ -Sp8                                                                    |
| 19           | Gal $\beta$ 1-4GlcNAc $\beta$ 1-3(Gal $\beta$ 1-4GlcNAc $\beta$ 1-6)GalNAc $\alpha$ -Sp8 |
| 20           | GlcNAc $\beta$ 1-3(GlcNAc $\beta$ 1-4)(GlcNAc $\beta$ 1-6)GlcNAc-Sp8                     |
| 21           | [3OSO3][6OSO3]Gal $\beta$ 1-4[6OSO3]GlcNAc $\beta$ -Sp0                                  |
| 22           | [3OSO3][6OSO3]Gal $\beta$ 1-4GlcNAc $\beta$ -Sp0                                         |
| 23           | [3OSO3]Gal $\beta$ 1-4(Fuc $\alpha$ 1-3)[6OSO3]Glc-Sp0                                   |
| 24           | [3OSO3]Gal $\beta$ 1-4Glc $\beta$ -Sp8                                                   |
| 25           | [3OSO3]Gal $\beta$ 1-4[6OSO3]Glc $\beta$ -Sp0                                            |
| 26           | [3OSO3]Gal $\beta$ 1-4[6OSO3]Glc $\beta$ -Sp8                                            |
| 27           | [3OSO3]Gal $\beta$ 1-3(Fuc $\alpha$ 1-4)GlcNAc $\beta$ -Sp8                              |
| 28           | [3OSO3]Gal $\beta$ 1-3GalNAc $\alpha$ -Sp8                                               |
| 29           | [3OSO3]Gal $\beta$ 1-3GlcNAc $\beta$ -Sp0                                                |
| 30           | [3OSO3]Gal $\beta$ 1-3GlcNAc $\beta$ -Sp8                                                |
| 31           | [3OSO3]Gal $\beta$ 1-4(Fuc $\alpha$ 1-3)GlcNAc-Sp0                                       |
| 32           | [3OSO3]Gal $\beta$ 1-4(Fuc $\alpha$ 1-3)GlcNAc $\beta$ -Sp8                              |
| 33           | [3OSO3]Gal $\beta$ 1-4[6OSO3]GlcNAc $\beta$ -Sp0                                         |
| 34           | [3OSO3]Gal $\beta$ 1-4[6OSO3]GlcNAc $\beta$ -Sp8                                         |
| 35           | [3OSO3]Gal $\beta$ 1-4GlcNAc $\beta$ -Sp0                                                |
| 36           | [3OSO3]Gal $\beta$ 1-4GlcNAc $\beta$ -Sp8                                                |
| 37           | [3OSO3]Gal $\beta$ -Sp8                                                                  |
| 38           | [4OSO3][6OSO3]Gal $\beta$ 1-4GlcNAc $\beta$ -Sp0                                         |
| 39           | [4OSO3]Gal $\beta$ 1-4GlcNAc $\beta$ -Sp8                                                |
| 40           | 6-H <sub>2</sub> PO <sub>3</sub> Man $\alpha$ -Sp8                                       |
| 41           | [6OSO3]Gal $\beta$ 1-4Glc $\beta$ -Sp0                                                   |
| 42           | [6OSO3]Gal $\beta$ 1-4Glc $\beta$ -Sp8                                                   |
| 43           | [6OSO3]Gal $\beta$ 1-4GlcNAc $\beta$ -Sp8                                                |
| 44           | [6OSO3]Gal $\beta$ 1-4[6OSO3]Glc $\beta$ -Sp8                                            |

|    |                                                                                                                                                                                                     |
|----|-----------------------------------------------------------------------------------------------------------------------------------------------------------------------------------------------------|
| 45 | Neu5Ac $\alpha$ 2-3[6OSO <sub>3</sub> ]Gal $\beta$ 1-4GlcNAc $\beta$ -Sp8                                                                                                                           |
| 46 | [6OSO <sub>3</sub> ]GlcNAc $\beta$ -Sp8                                                                                                                                                             |
| 47 | [9NAc]Neu5Ac $\alpha$ -Sp8                                                                                                                                                                          |
| 48 | [9NAc]Neu5Ac $\alpha$ 2-6Gal $\beta$ 1-4GlcNAc $\beta$ -Sp8                                                                                                                                         |
| 49 | Man $\alpha$ 1-3(Man $\alpha$ 1-6)Man $\beta$ 1-4GlcNAc $\beta$ 1-4GlcNAc $\beta$ -Sp12                                                                                                             |
| 50 | Man $\alpha$ 1-3(Man $\alpha$ 1-6)Man $\beta$ 1-4GlcNAc $\beta$ 1-4GlcNAc $\beta$ -Sp13                                                                                                             |
| 51 | GlcNAc $\beta$ 1-2Man $\alpha$ 1-3(GlcNAc $\beta$ 1-2Man $\alpha$ 1-6)Man $\beta$ 1-4GlcNAc $\beta$ 1-4GlcNAc $\beta$ -Sp12                                                                         |
| 52 | GlcNAc $\beta$ 1-2Man $\alpha$ 1-3(GlcNAc $\beta$ 1-2Man $\alpha$ 1-6)Man $\beta$ 1-4GlcNAc $\beta$ 1-4GlcNAc $\beta$ -Sp13                                                                         |
| 53 | Gal $\beta$ 1-4GlcNAc $\beta$ 1-2Man $\alpha$ 1-3(Gal $\beta$ 1-4GlcNAc $\beta$ 1-2Man $\alpha$ 1-6)Man $\beta$ 1-4GlcNAc $\beta$ 1-4GlcNAc $\beta$ -Sp12                                           |
| 54 | Neu5Ac $\alpha$ 2-6Gal $\beta$ 1-4GlcNAc $\beta$ 1-2Man $\alpha$ 1-3(Neu5Ac $\alpha$ 2-6Gal $\beta$ 1-4GlcNAc $\beta$ 1-2Man $\alpha$ 1-6)Man $\beta$ 1-4GlcNAc $\beta$ 1-4GlcNAc $\beta$ -N(LT)AVL |
| 55 | Neu5Ac $\alpha$ 2-6Gal $\beta$ 1-4GlcNAc $\beta$ 1-2Man $\alpha$ 1-3(Neu5Ac $\alpha$ 2-6Gal $\beta$ 1-4GlcNAc $\beta$ 1-2Man $\alpha$ 1-6)Man $\beta$ 1-4GlcNAc $\beta$ 1-4GlcNAc $\beta$ -Sp8      |
| 56 | Neu5Ac $\alpha$ 2-6Gal $\beta$ 1-4GlcNAc $\beta$ 1-2Man $\alpha$ 1-3(Neu5Ac $\alpha$ 2-6Gal $\beta$ 1-4GlcNAc $\beta$ 1-2Man $\alpha$ 1-6)Man $\beta$ 1-4GlcNAc $\beta$ 1-4GlcNAc $\beta$ -Sp12     |
| 57 | Neu5Ac $\alpha$ 2-6Gal $\beta$ 1-4GlcNAc $\beta$ 1-2Man $\alpha$ 1-3(Neu5Ac $\alpha$ 2-6Gal $\beta$ 1-4GlcNAc $\beta$ 1-2Man $\alpha$ 1-6)Man $\beta$ 1-4GlcNAc $\beta$ 1-4GlcNAc $\beta$ -Sp13     |
| 58 | Fuca1-2Gal $\beta$ 1-3GalNAc $\beta$ 1-3Gal $\alpha$ -Sp9                                                                                                                                           |
| 59 | Fuca1-2Gal $\beta$ 1-3GalNAc $\beta$ 1-3Gal $\alpha$ 1-4Gal $\beta$ 1-4Glc $\beta$ -Sp9                                                                                                             |
| 60 | Fuca1-2Gal $\beta$ 1-3(Fuca1-4)GlcNAc $\beta$ -Sp8                                                                                                                                                  |
| 61 | Fuca1-2Gal $\beta$ 1-3GalNAc $\alpha$ -Sp8                                                                                                                                                          |
| 62 | Fuca1-2Gal $\beta$ 1-3GalNAc $\alpha$ -Sp14                                                                                                                                                         |
| 63 | Fuca1-2Gal $\beta$ 1-3GalNAc $\beta$ 1-4(Neu5Ac $\alpha$ 2-3)Gal $\beta$ 1-4Glc $\beta$ -Sp0                                                                                                        |
| 64 | Fuca1-2Gal $\beta$ 1-3GalNAc $\beta$ 1-4(Neu5Ac $\alpha$ 2-3)Gal $\beta$ 1-4Glc $\beta$ -Sp9                                                                                                        |
| 65 | Fuca1-2Gal $\beta$ 1-3GlcNAc $\beta$ 1-3Gal $\beta$ 1-4Glc $\beta$ -Sp8                                                                                                                             |
| 66 | Fuca1-2Gal $\beta$ 1-3GlcNAc $\beta$ 1-3Gal $\beta$ 1-4Glc $\beta$ -Sp10                                                                                                                            |
| 67 | Fuca1-2Gal $\beta$ 1-3GlcNAc $\beta$ -Sp0                                                                                                                                                           |
| 68 | Fuca1-2Gal $\beta$ 1-3GlcNAc $\beta$ -Sp8                                                                                                                                                           |
| 69 | Fuca1-2Gal $\beta$ 1-4(Fuca1-3)GlcNAc $\beta$ 1-3Gal $\beta$ 1-4(Fuca1-3)GlcNAc $\beta$ -Sp0                                                                                                        |
| 70 | Fuca1-2Gal $\beta$ 1-4(Fuca1-3)GlcNAc $\beta$ 1-3Gal $\beta$ 1-4(Fuca1-3)GlcNAc $\beta$ 1-3Gal $\beta$ 1-4(Fuca1-3)GlcNAc $\beta$ -Sp0                                                              |
| 71 | Fuca1-2Gal $\beta$ 1-4(Fuca1-3)GlcNAc $\beta$ -Sp0                                                                                                                                                  |
| 72 | Fuca1-2Gal $\beta$ 1-4(Fuca1-3)GlcNAc $\beta$ -Sp8                                                                                                                                                  |
| 73 | Fuca1-2Gal $\beta$ 1-4GlcNAc $\beta$ 1-3Gal $\beta$ 1-4GlcNAc $\beta$ -Sp0                                                                                                                          |
| 74 | Fuca1-2Gal $\beta$ 1-4GlcNAc $\beta$ 1-3Gal $\beta$ 1-4GlcNAc $\beta$ 1-3Gal $\beta$ 1-4GlcNAc $\beta$ -Sp0                                                                                         |
| 75 | Fuca1-2Gal $\beta$ 1-4GlcNAc $\beta$ -Sp0                                                                                                                                                           |
| 76 | Fuca1-2Gal $\beta$ 1-4GlcNAc $\beta$ -Sp8                                                                                                                                                           |
| 77 | Fuca1-2Gal $\beta$ 1-4Glc $\beta$ -Sp0                                                                                                                                                              |
| 78 | Fuca1-2Gal $\beta$ -Sp8                                                                                                                                                                             |
| 79 | Fuca1-3GlcNAc $\beta$ -Sp8                                                                                                                                                                          |
| 80 | Fuca1-4GlcNAc $\beta$ -Sp8                                                                                                                                                                          |
| 81 | Fuc $\beta$ 1-3GlcNAc $\beta$ -Sp8                                                                                                                                                                  |
| 82 | GalNAc $\alpha$ 1-3(Fuca1-2)Gal $\beta$ 1-3GlcNAc $\beta$ -Sp0                                                                                                                                      |
| 83 | GalNAc $\alpha$ 1-3(Fuca1-2)Gal $\beta$ 1-4(Fuca1-3)GlcNAc $\beta$ -Sp0                                                                                                                             |
| 84 | [3OSO <sub>3</sub> ]Gal $\beta$ 1-4(Fuca1-3)Glc-Sp0                                                                                                                                                 |
| 85 | GalNAc $\alpha$ 1-3(Fuca1-2)Gal $\beta$ 1-4GlcNAc $\beta$ -Sp0                                                                                                                                      |
| 86 | GalNAc $\alpha$ 1-3(Fuca1-2)Gal $\beta$ 1-4GlcNAc $\beta$ -Sp8                                                                                                                                      |
| 87 | GalNAc $\alpha$ 1-3(Fuca1-2)Gal $\beta$ 1-4Glc $\beta$ -Sp0                                                                                                                                         |

|     |                                                                                       |
|-----|---------------------------------------------------------------------------------------|
| 88  | GlcNAc $\beta$ 1-3Gal $\beta$ 1-3GalNAc $\alpha$ -Sp8                                 |
| 89  | GalNAc $\alpha$ 1-3(Fuca1-2)Gal $\beta$ -Sp8                                          |
| 90  | GalNAc $\alpha$ 1-3(Fuca1-2)Gal $\beta$ -Sp18                                         |
| 91  | GalNAc $\alpha$ 1-3GalNAc $\beta$ -Sp8                                                |
| 92  | GalNAc $\alpha$ 1-3Gal $\beta$ -Sp8                                                   |
| 93  | GalNAc $\alpha$ 1-4(Fuca1-2)Gal $\beta$ 1-4GlcNAc $\beta$ -Sp8                        |
| 94  | GalNAc $\beta$ 1-3GalNAc $\alpha$ -Sp8                                                |
| 95  | GalNAc $\beta$ 1-3(Fuca1-2)Gal $\beta$ -Sp8                                           |
| 96  | GalNAc $\beta$ 1-3Gal $\alpha$ 1-4Gal $\beta$ 1-4GlcNAc $\beta$ -Sp0                  |
| 97  | GalNAc $\beta$ 1-4(Fuca1-3)GlcNAc $\beta$ -Sp0                                        |
| 98  | GalNAc $\beta$ 1-4GlcNAc $\beta$ -Sp0                                                 |
| 99  | GalNAc $\beta$ 1-4GlcNAc $\beta$ -Sp8                                                 |
| 100 | Gal $\alpha$ 1-2Gal $\beta$ -Sp8                                                      |
| 101 | Gal $\alpha$ 1-3(Fuca1-2)Gal $\beta$ 1-3GlcNAc $\beta$ -Sp0                           |
| 102 | Gal $\alpha$ 1-3(Fuca1-2)Gal $\beta$ 1-3GlcNAc $\beta$ -Sp8                           |
| 103 | Gal $\alpha$ 1-3(Fuca1-2)Gal $\beta$ 1-4(Fuca1-3)GlcNAc $\beta$ -Sp0                  |
| 104 | Gal $\alpha$ 1-3(Fuca1-2)Gal $\beta$ 1-4(Fuca1-3)GlcNAc $\beta$ -Sp8                  |
| 105 | Gal $\alpha$ 1-3(Fuca1-2)Gal $\beta$ 1-4GlcNAc-Sp0                                    |
| 106 | Gal $\alpha$ 1-3(Fuca1-2)Gal $\beta$ 1-4Glc $\beta$ -Sp0                              |
| 107 | Gal $\alpha$ 1-3(Fuca1-2)Gal $\beta$ -Sp8                                             |
| 108 | Gal $\alpha$ 1-3(Fuca1-2)Gal $\beta$ -Sp18                                            |
| 109 | Gal $\alpha$ 1-3(Gal $\alpha$ 1-4)Gal $\beta$ 1-4GlcNAc $\beta$ -Sp8                  |
| 110 | Gal $\alpha$ 1-3GalNAc $\alpha$ -Sp8                                                  |
| 111 | Gal $\alpha$ 1-3GalNAc $\alpha$ -Sp16                                                 |
| 112 | Gal $\alpha$ 1-3GalNAc $\beta$ -Sp8                                                   |
| 113 | Gal $\alpha$ 1-3Gal $\beta$ 1-4(Fuca1-3)GlcNAc $\beta$ -Sp8                           |
| 114 | Gal $\alpha$ 1-3Gal $\beta$ 1-3GlcNAc $\beta$ -Sp0                                    |
| 115 | Gal $\alpha$ 1-3Gal $\beta$ 1-4GlcNAc $\beta$ -Sp8                                    |
| 116 | Gal $\alpha$ 1-3Gal $\beta$ 1-4Glc $\beta$ -Sp0                                       |
| 117 | Gal $\alpha$ 1-3Gal $\beta$ -Sp8                                                      |
| 118 | Gal $\alpha$ 1-4(Fuca1-2)Gal $\beta$ 1-4GlcNAc $\beta$ -Sp8                           |
| 119 | Gal $\alpha$ 1-4Gal $\beta$ 1-4GlcNAc $\beta$ -Sp0                                    |
| 120 | Gal $\alpha$ 1-4Gal $\beta$ 1-4GlcNAc $\beta$ -Sp8                                    |
| 121 | Gal $\alpha$ 1-4Gal $\beta$ 1-4Glc $\beta$ -Sp0                                       |
| 122 | Gal $\alpha$ 1-4GlcNAc $\beta$ -Sp8                                                   |
| 123 | Gal $\alpha$ 1-6Glc $\beta$ -Sp8                                                      |
| 124 | Gal $\beta$ 1-2Gal $\beta$ -Sp8                                                       |
| 125 | Gal $\beta$ 1-3(Fuca1-4)GlcNAc $\beta$ 1-3Gal $\beta$ 1-4(Fuca1-3)GlcNAc $\beta$ -Sp0 |
| 126 | Gal $\beta$ 1-3(Fuca1-4)GlcNAc $\beta$ 1-3Gal $\beta$ 1-4GlcNAc $\beta$ -Sp0          |
| 127 | Gal $\beta$ 1-3(Fuca1-4)GlcNAc $\beta$ -Sp0                                           |
| 128 | Gal $\beta$ 1-3(Fuca1-4)GlcNAc $\beta$ -Sp8                                           |
| 129 | Gal $\beta$ 1-3(Fuca1-4)GlcNAc-Sp8                                                    |
| 130 | Gal $\beta$ 1-4GlcNAc $\beta$ 1-6GalNAc $\alpha$ -Sp8                                 |
| 131 | Gal $\beta$ 1-3(GlcNAc $\beta$ 1-6)GalNAc $\alpha$ -Sp8                               |
| 132 | Gal $\beta$ 1-3(GlcNAc $\beta$ 1-6)GalNAc-Sp14                                        |
| 133 | Gal $\beta$ 1-3(Neu5Ac $\alpha$ 2-6)GalNAc $\alpha$ -Sp8                              |
| 134 | Gal $\beta$ 1-3(Neu5Ac $\alpha$ 2-6)GalNAc $\alpha$ -Sp14                             |



|     |                                                                                 |
|-----|---------------------------------------------------------------------------------|
| 135 | Galβ1-3(Neu5Acβ2-6)GalNAcα-Sp8                                                  |
| 136 | Galβ1-3(Neu5Acα2-6)GlcNAcβ1-4Galβ1-4Glcβ-Sp10                                   |
| 137 | Galβ1-3GalNAcα-Sp8                                                              |
| 138 | Galβ1-3GalNAcα-Sp14                                                             |
| 139 | Galβ1-3GalNAcα-Sp16                                                             |
| 140 | Galβ1-3GalNAcβ-Sp8                                                              |
| 141 | Galβ1-3GalNAcβ1-3Galα1-4Galβ1-4Glcβ-Sp0                                         |
| 142 | Galβ1-3GalNAcβ1-4(Neu5Acα2-3)Galβ1-4Glcβ-Sp0                                    |
| 143 | Galβ1-3GalNAcβ1-4Galβ1-4Glcβ-Sp8                                                |
| 144 | Galβ1-3Galβ-Sp8                                                                 |
| 145 | Galβ1-3GlcNAcβ1-3Galβ1-4GlcNAcβ-Sp0                                             |
| 146 | Galβ1-3GlcNAcβ1-3Galβ1-4Glcβ-Sp10                                               |
| 147 | Galβ1-3GlcNAcβ-Sp0                                                              |
| 148 | Galβ1-3GlcNAcβ-Sp8                                                              |
| 149 | Galβ1-4(Fuca1-3)GlcNAcβ-Sp0                                                     |
| 150 | Galβ1-4(Fuca1-3)GlcNAcβ-Sp8                                                     |
| 151 | Galβ1-4(Fuca1-3)GlcNAcβ1-4Galβ1-4(Fuca1-3)GlcNAcβ-Sp0                           |
| 152 | Galβ1-4(Fuca1-3)GlcNAcβ1-4Galβ1-4(Fuca1-3)GlcNAcβ1-4Galβ1-4(Fuca1-3)GlcNAcβ-Sp0 |
| 153 | Galβ1-4[6OSO3]Glcβ-Sp0                                                          |
| 154 | Galβ1-4[6OSO3]Glcβ-Sp8                                                          |
| 155 | Galβ1-4GalNAcα1-3(Fuca1-2)Galβ1-4GlcNAcβ-Sp8                                    |
| 156 | Galβ1-4GalNAcβ1-3(Fuca1-2)Galβ1-4GlcNAcβ-Sp8                                    |
| 157 | Galβ1-4GlcNAcβ1-3GalNAcα-Sp8                                                    |
| 158 | Galβ1-4GlcNAcβ1-3GalNAcα-Sp14                                                   |
| 159 | Galβ1-4GlcNAcβ1-3Galβ1-4(Fuca1-3)GlcNAcβ1-3Galβ1-4(Fuca1-3)GlcNAcβ-Sp0          |
| 160 | Galβ1-4GlcNAcβ1-3Galβ1-4GlcNAcβ1-3Galβ1-4GlcNAcβ-Sp0                            |
| 161 | Galβ1-4GlcNAcβ1-3Galβ1-4GlcNAcβ-Sp0                                             |
| 162 | Galβ1-4GlcNAcβ1-3Galβ1-4Glcβ-Sp0                                                |
| 163 | Galβ1-4GlcNAcβ1-3Galβ1-4Glcβ-Sp8                                                |
| 164 | Galβ1-4GlcNAcβ1-6(Galβ1-3)GalNAcα-Sp8                                           |
| 165 | Galβ1-3(Galβ1-4GlcNAcβ1-6)GalNAcα-Sp8                                           |
| 166 | Galβ1-3(Galβ1-4GlcNAcβ1-6)GalNAc-Sp14                                           |
| 167 | Galβ1-4GlcNAcβ-Sp0                                                              |
| 168 | Galβ1-4GlcNAcβ-Sp8                                                              |
| 169 | Galβ1-4Glcβ-Sp0                                                                 |
| 170 | Galβ1-4Glcβ-Sp8                                                                 |
| 171 | GlcNAcα1-3Galβ1-4GlcNAcβ-Sp8                                                    |
| 172 | GlcNAcα1-6Galβ1-4GlcNAcβ-Sp8                                                    |
| 173 | GlcNAcβ1-2Galβ1-3GalNAcα-Sp8                                                    |
| 174 | GlcNAcβ1-3(GlcNAcβ1-6)GalNAcα-Sp8                                               |
| 175 | GlcNAcβ1-3(GlcNAcβ1-6)Galβ1-4GlcNAcβ-Sp8                                        |
| 176 | GlcNAcβ1-3GalNAcα-Sp8                                                           |
| 177 | GlcNAcβ1-3GalNAcα-Sp14                                                          |
| 178 | GlcNAcβ1-3Galβ-Sp8                                                              |
| 179 | GlcNAcβ1-3Galβ1-4GlcNAcβ-Sp0                                                    |
| 180 | GlcNAcβ1-3Galβ1-4GlcNAcβ-Sp8                                                    |

|     |                                                                                                                                                                                           |
|-----|-------------------------------------------------------------------------------------------------------------------------------------------------------------------------------------------|
| 181 | GlcNAc $\beta$ 1-3Gal $\beta$ 1-4GlcNAc $\beta$ 1-3Gal $\beta$ 1-4GlcNAc $\beta$ -Sp0                                                                                                     |
| 182 | GlcNAc $\beta$ 1-3Gal $\beta$ 1-4Glc $\beta$ -Sp0                                                                                                                                         |
| 183 | GlcNAc $\beta$ 1-4-MDPLys                                                                                                                                                                 |
| 184 | GlcNAc $\beta$ 1-4(GlcNAc $\beta$ 1-6)GalNAc $\alpha$ -Sp8                                                                                                                                |
| 185 | GlcNAc $\beta$ 1-4Gal $\beta$ 1-4GlcNAc $\beta$ -Sp8                                                                                                                                      |
| 186 | GlcNAc $\beta$ 1-4GlcNAc $\beta$ 1-4GlcNAc $\beta$ 1-4GlcNAc $\beta$ 1-4GlcNAc $\beta$ 1-4GlcNAc $\beta$ 1-4 $\beta$ -Sp8                                                                 |
| 187 | GlcNAc $\beta$ 1-4GlcNAc $\beta$ 1-4GlcNAc $\beta$ 1-4GlcNAc $\beta$ 1-4GlcNAc $\beta$ -Sp8                                                                                               |
| 188 | GlcNAc $\beta$ 1-4GlcNAc $\beta$ 1-4GlcNAc $\beta$ -Sp8                                                                                                                                   |
| 189 | GlcNAc $\beta$ 1-6(Gal $\beta$ 1-3)GalNAc $\alpha$ -Sp8                                                                                                                                   |
| 190 | GlcNAc $\beta$ 1-6GalNAc $\alpha$ -Sp8                                                                                                                                                    |
| 191 | GlcNAc $\beta$ 1-6GalNAc $\alpha$ -Sp14                                                                                                                                                   |
| 192 | GlcNAc $\beta$ 1-6Gal $\beta$ 1-4GlcNAc $\beta$ -Sp8                                                                                                                                      |
| 193 | Glc $\alpha$ 1-4Glc $\beta$ -Sp8                                                                                                                                                          |
| 194 | Glc $\alpha$ 1-4Glc $\alpha$ -Sp8                                                                                                                                                         |
| 195 | Glc $\alpha$ 1-6Glc $\alpha$ 1-6Glc $\beta$ -Sp8                                                                                                                                          |
| 196 | Glc $\beta$ 1-4Glc $\beta$ -Sp8                                                                                                                                                           |
| 197 | Glc $\beta$ 1-6Glc $\beta$ -Sp8                                                                                                                                                           |
| 198 | G-ol-Sp8                                                                                                                                                                                  |
| 199 | Glc $\alpha$ -Sp8                                                                                                                                                                         |
| 200 | Glc $\alpha$ $\beta$ -Sp8                                                                                                                                                                 |
| 201 | Glc $\alpha$ $\beta$ 1-3Gal $\beta$ -Sp8                                                                                                                                                  |
| 202 | Glc $\alpha$ $\beta$ 1-6Gal $\beta$ -Sp8                                                                                                                                                  |
| 203 | KDN $\alpha$ 2-3Gal $\beta$ 1-3GlcNAc $\beta$ -Sp0                                                                                                                                        |
| 204 | KDN $\alpha$ 2-3Gal $\beta$ 1-4GlcNAc $\beta$ -Sp0                                                                                                                                        |
| 205 | Man $\alpha$ 1-2Man $\alpha$ 1-2Man $\alpha$ 1-3Man $\alpha$ -Sp9                                                                                                                         |
| 206 | Man $\alpha$ 1-2Man $\alpha$ 1-3(Man $\alpha$ 1-2Man $\alpha$ 1-6)Man $\alpha$ -Sp9                                                                                                       |
| 207 | Man $\alpha$ 1-2Man $\alpha$ 1-3Man $\alpha$ -Sp9                                                                                                                                         |
| 208 | Man $\alpha$ 1-6(Man $\alpha$ 1-2Man $\alpha$ 1-3)Man $\alpha$ 1-6(Man $\alpha$ 1-2Man $\alpha$ 1-3)Man $\beta$ 1-4GlcNAc $\beta$ 1-4GlcNAc $\beta$ -Sp12                                 |
| 209 | Man $\alpha$ 1-2Man $\alpha$ 1-6(Man $\alpha$ 1-3)Man $\alpha$ 1-6(Man $\alpha$ 1-2Man $\alpha$ 1-2Man $\alpha$ 1-3)Man $\beta$ 1-4GlcNAc $\beta$ 1-4GlcNAc $\beta$ -Sp12                 |
| 210 | Man $\alpha$ 1-2Man $\alpha$ 1-2Man $\alpha$ 1-3(Man $\alpha$ 1-2Man $\alpha$ 1-3(Man $\alpha$ 1-2Man $\alpha$ 1-6)Man $\alpha$ 1-6)Man $\beta$ 1-4GlcNAc $\beta$ 1-4GlcNAc $\beta$ -Sp12 |
| 211 | Man $\alpha$ 1-3(Man $\alpha$ 1-6)Man $\alpha$ -Sp9                                                                                                                                       |
| 212 | Man $\alpha$ 1-3(Man $\alpha$ 1-2Man $\alpha$ 1-2Man $\alpha$ 1-6)Man $\alpha$ -Sp9                                                                                                       |
| 213 | Man $\alpha$ 1-6(Man $\alpha$ 1-3)Man $\alpha$ 1-6(Man $\alpha$ 1-2Man $\alpha$ 1-3)Man $\beta$ 1-4GlcNAc $\beta$ 1-4GlcNAc $\beta$ -Sp12                                                 |
| 214 | Man $\alpha$ 1-6(Man $\alpha$ 1-3)Man $\alpha$ 1-6(Man $\alpha$ 1-3)Man $\beta$ 1-4GlcNAc $\beta$ 1-4GlcNAc $\beta$ -Sp12                                                                 |
| 215 | Man $\beta$ 1-4GlcNAc $\beta$ -Sp0                                                                                                                                                        |
| 216 | Neu5Ac $\alpha$ 2-3Gal $\beta$ 1-4GlcNAc $\beta$ 1-3Gal $\beta$ 1-4(Fuc $\alpha$ 1-3)GlcNAc-Sp0                                                                                           |
| 217 | [3OSO3]Gal $\beta$ 1-4(Fuc $\alpha$ 1-3)[6OSO3]GlcNAc-Sp8                                                                                                                                 |
| 218 | Fuc $\alpha$ 1-2[6OSO3]Gal $\beta$ 1-4GlcNAc-Sp0                                                                                                                                          |
| 219 | Fuc $\alpha$ 1-2Gal $\beta$ 1-4[6OSO3]GlcNAc-Sp8                                                                                                                                          |
| 220 | Fuc $\alpha$ 1-2[6OSO3]Gal $\beta$ 1-4[6OSO3]Glc-Sp0                                                                                                                                      |
| 221 | Neu5Ac $\alpha$ 2-3Gal $\beta$ 1-3GalNAc $\alpha$ -Sp8                                                                                                                                    |
| 222 | Neu5Ac $\alpha$ 2-3Gal $\beta$ 1-3GalNAc $\alpha$ -Sp14                                                                                                                                   |
| 223 | Neu5Ac $\alpha$ 2-8Neu5Ac $\alpha$ 2-8Neu5Ac $\alpha$ 2-8Neu5Ac $\alpha$ 2-3(GalNAc $\beta$ 1-4)Gal $\beta$ 1-4Glc $\beta$ -Sp0                                                           |
| 224 | Neu5Ac $\alpha$ 2-8Neu5Ac $\alpha$ 2-8Neu5Ac $\alpha$ 2-3(GalNAc $\beta$ 1-4)Gal $\beta$ 1-4Glc $\beta$ -Sp0                                                                              |
| 225 | Neu5Ac $\alpha$ 2-8Neu5Ac $\alpha$ 2-8Neu5Ac $\alpha$ 2-3Gal $\beta$ 1-4Glc $\beta$ -Sp0                                                                                                  |

|     |                                                                                           |
|-----|-------------------------------------------------------------------------------------------|
| 226 | Neu5Acα2-8Neu5Acα2-3(GalNAcβ1-4)Galβ1-4Glcβ-Sp0                                           |
| 227 | Neu5Acα2-8Neu5Acα2-8Neu5Acα-Sp8                                                           |
| 228 | Neu5Acα2-3(6-O-Su)Galβ1-4(Fuca1-3)GlcNAcβ-Sp8                                             |
| 229 | Neu5Acα2-3(GalNAcβ1-4)Galβ1-4GlcNAcβ-Sp0                                                  |
| 230 | Neu5Acα2-3(GalNAcβ1-4)Galβ1-4GlcNAcβ-Sp8                                                  |
| 231 | Neu5Acα2-3(GalNAcβ1-4)Galβ1-4Glcβ-Sp0                                                     |
| 232 | Neu5Acα2-3(Neu5Acα2-3Galβ1-3GalNAcβ1-4)Galβ1-4Glcβ-Sp0                                    |
| 233 | Neu5Acα2-3(Neu5Acα2-6)GalNAcα-Sp8                                                         |
| 234 | Neu5Acα2-3GalNAcα-Sp8                                                                     |
| 235 | Neu5Acα2-3GalNAcβ1-4GlcNAcβ-Sp0                                                           |
| 236 | Neu5Acα2-3Galβ1-3[6OSO3]GlcNAc-Sp8                                                        |
| 237 | Neu5Acα2-3Galβ1-3(Fuca1-4)GlcNAcβ-Sp8                                                     |
| 238 | Neu5Acα2-3Galβ1-3(Fuca1-4)GlcNAcβ1-3Galβ1-4(Fuca1-3)GlcNAcβ-Sp0                           |
| 239 | Neu5Acα2-3Galβ1-3(Neu5Acα2-3Galβ1-4)GlcNAcβ-Sp8                                           |
| 240 | Neu5Acα2-3Galβ1-3[6OSO3]GalNAcα-Sp8                                                       |
| 241 | Neu5Acα2-3Galβ1-3(Neu5Acα2-6)GalNAcα-Sp8                                                  |
| 242 | Neu5Acα2-3Galβ1-3(Neu5Acα2-6)GalNAcα-Sp14                                                 |
| 243 | Neu5Acα2-3Galβ-Sp8                                                                        |
| 244 | Neu5Acα2-3Galβ1-3GalNAcβ1-3Galα1-4Galβ1-4Glcβ-Sp0                                         |
| 245 | Neu5Acα2-3Galβ1-3GlcNAcβ1-3Galβ1-4GlcNAcβ-Sp0                                             |
| 246 | Fuca1-2[6OSO3]Galβ1-4Glc-Sp0                                                              |
| 247 | Neu5Acα2-3Galβ1-3GlcNAcβ-Sp0                                                              |
| 248 | Neu5Acα2-3Galβ1-3GlcNAcβ-Sp8                                                              |
| 249 | Neu5Acα2-3Galβ1-4[6OSO3]GlcNAcβ-Sp8                                                       |
| 250 | Neu5Acα2-3Galβ1-4(Fuca1-3)[6OSO3]GlcNAcβ-Sp8                                              |
| 251 | Neu5Acα2-3Galβ1-4(Fuca1-3)GlcNAcβ1-3Galβ1-4(Fuca1-3)GlcNAcβ1-3Galβ1-4(Fuca1-3)GlcNAcβ-Sp0 |
| 252 | Neu5Acα2-3Galβ1-4(Fuca1-3)GlcNAcβ-Sp0                                                     |
| 253 | Neu5Acα2-3Galβ1-4(Fuca1-3)GlcNAcβ-Sp8                                                     |
| 254 | Neu5Acα2-3Galβ1-4(Fuca1-3)GlcNAcβ1-3Galβ-Sp8                                              |
| 255 | Neu5Acα2-3Galβ1-4(Fuca1-3)GlcNAcβ1-3Galβ1-4GlcNAcβ-Sp8                                    |
| 256 | Neu5Acα2-3Galβ1-4GlcNAcβ1-3Galβ1-4GlcNAcβ1-3Galβ1-4GlcNAcβ-Sp0                            |
| 257 | Neu5Acα2-3Galβ1-4GlcNAcβ-Sp0                                                              |
| 258 | Neu5Acα2-3Galβ1-4GlcNAcβ-Sp8                                                              |
| 259 | Neu5Acα2-3Galβ1-4GlcNAcβ1-3Galβ1-4GlcNAcβ-Sp0                                             |
| 260 | Fuca1-2Galβ1-4[6OSO3]Glc-Sp0                                                              |
| 261 | Neu5Acα2-3Galβ1-4Glcβ-Sp0                                                                 |
| 262 | Neu5Acα2-3Galβ1-4Glcβ-Sp8                                                                 |
| 263 | Neu5Acα2-6GalNAcα-Sp8                                                                     |
| 264 | Neu5Acα2-6GalNAcβ1-4GlcNAcβ-Sp0                                                           |
| 265 | Neu5Acα2-6Galβ1-4[6OSO3]GlcNAcβ-Sp8                                                       |
| 266 | Neu5Acα2-6Galβ1-4GlcNAcβ-Sp0                                                              |
| 267 | Neu5Acα2-6Galβ1-4GlcNAcβ-Sp8                                                              |
| 268 | Neu5Acα2-6Galβ1-4GlcNAcβ1-3Galβ1-4(Fuca1-3)GlcNAcβ1-3Galβ1-4(Fuca1-3)GlcNAcβ-Sp0          |
| 269 | Neu5Acα2-6Galβ1-4GlcNAcβ1-3Galβ1-4GlcNAcβ-Sp0                                             |
| 270 | Neu5Acα2-6Galβ1-4Glcβ-Sp0                                                                 |
| 271 | Neu5Acα2-6Galβ1-4Glcβ-Sp8                                                                 |

|     |                                                                                                                                                                                                 |
|-----|-------------------------------------------------------------------------------------------------------------------------------------------------------------------------------------------------|
| 272 | Neu5Ac $\alpha$ 2-6Gal $\beta$ -Sp8                                                                                                                                                             |
| 273 | Neu5Ac $\alpha$ 2-8Neu5Ac $\alpha$ -Sp8                                                                                                                                                         |
| 274 | Neu5Ac $\alpha$ 2-8Neu5Ac $\alpha$ 2-3Gal $\beta$ 1-4Glc $\beta$ -Sp0                                                                                                                           |
| 275 | Gal $\beta$ 1-3(Fuca1-4)GlcNAc $\beta$ 1-3Gal $\beta$ 1-3(Fuca1-4)GlcNAc $\beta$ -Sp0                                                                                                           |
| 276 | Neu5Ac $\beta$ 2-6GalNAc $\alpha$ -Sp8                                                                                                                                                          |
| 277 | Neu5Ac $\beta$ 2-6Gal $\beta$ 1-4GlcNAc $\beta$ -Sp8                                                                                                                                            |
| 278 | Neu5Gc $\alpha$ 2-3Gal $\beta$ 1-3(Fuca1-4)GlcNAc $\beta$ -Sp0                                                                                                                                  |
| 279 | Neu5Gc $\alpha$ 2-3Gal $\beta$ 1-3GlcNAc $\beta$ -Sp0                                                                                                                                           |
| 280 | Neu5Gc $\alpha$ 2-3Gal $\beta$ 1-4(Fuca1-3)GlcNAc $\beta$ -Sp0                                                                                                                                  |
| 281 | Neu5Gc $\alpha$ 2-3Gal $\beta$ 1-4GlcNAc $\beta$ -Sp0                                                                                                                                           |
| 282 | Neu5Gc $\alpha$ 2-3Gal $\beta$ 1-4Glc $\beta$ -Sp0                                                                                                                                              |
| 283 | Neu5Gc $\alpha$ 2-6GalNAc $\alpha$ -Sp0                                                                                                                                                         |
| 284 | Neu5Gc $\alpha$ 2-6Gal $\beta$ 1-4GlcNAc $\beta$ -Sp0                                                                                                                                           |
| 285 | Neu5Gc $\alpha$ -Sp8                                                                                                                                                                            |
| 286 | Gal $\beta$ 1-3(Neu5Ac $\alpha$ 2-3Gal $\beta$ 1-4GlcNAc $\beta$ 1-6)GalNAc $\alpha$ -Sp14                                                                                                      |
| 287 | Gal $\beta$ 1-3GlcNAc $\beta$ 1-3Gal $\beta$ 1-3GlcNAc $\beta$ -Sp0                                                                                                                             |
| 288 | Gal $\beta$ 1-4(Fuca1-3)[6OSO <sub>3</sub> ]GlcNAc-Sp0                                                                                                                                          |
| 289 | Gal $\beta$ 1-4(Fuca1-3)[6OSO <sub>3</sub> ]Glc-Sp0                                                                                                                                             |
| 290 | Gal $\beta$ 1-4(Fuca1-3)GlcNAc $\beta$ 1-3Gal $\beta$ 1-3(Fuca1-4)GlcNAc $\beta$ -Sp0                                                                                                           |
| 291 | Gal $\beta$ 1-4GlcNAc $\beta$ 1-3Gal $\beta$ 1-3GlcNAc $\beta$ -Sp0                                                                                                                             |
| 292 | Neu5Ac $\alpha$ 2-3Gal $\beta$ 1-3GlcNAc $\beta$ 1-3Gal $\beta$ 1-3GlcNAc $\beta$ -Sp0                                                                                                          |
| 293 | Neu5Ac $\alpha$ 2-3Gal $\beta$ 1-4GlcNAc $\beta$ 1-3Gal $\beta$ 1-3GlcNAc $\beta$ -Sp0                                                                                                          |
| 294 | [3OSO <sub>3</sub> ][4OSO <sub>3</sub> ]Gal $\beta$ 1-4GlcNAc $\beta$ -Sp0                                                                                                                      |
| 295 | [6OSO <sub>3</sub> ]Gal $\beta$ 1-4[6OSO <sub>3</sub> ]GlcNAc $\beta$ -Sp0                                                                                                                      |
| 296 | 6-H <sub>2</sub> PO <sub>3</sub> Glc $\beta$ -Sp10                                                                                                                                              |
| 297 | Gal $\beta$ 1-3(Neu5Ac $\alpha$ 2-3Gal $\beta$ 1-4(Fuca1-3)GlcNAc $\beta$ 1-6)GalNAc $\alpha$ -Sp14                                                                                             |
| 298 | Gal $\beta$ 1-3Gal $\beta$ 1-4GlcNAc $\beta$ -Sp8                                                                                                                                               |
| 299 | Gal $\beta$ 1-4GlcNAc $\beta$ 1-2Man $\alpha$ 1-3(Neu5Ac $\alpha$ 2-6Gal $\beta$ 1-4GlcNAc $\beta$ 1-2Man $\alpha$ 1-6)Man $\beta$ 1-4GlcNAc $\beta$ 1-4GlcNAc $\beta$ -Sp12                    |
| 300 | Gal $\beta$ 1-4GlcNAc $\beta$ 1-3(Gal $\beta$ 1-4GlcNAc $\beta$ 1-6)Gal $\beta$ 1-4GlcNAc-Sp0                                                                                                   |
| 301 | Gal $\beta$ 1-4GlcNAc $\beta$ 1-3(GlcNAc $\beta$ 1-6)Gal $\beta$ 1-4GlcNAc-Sp0                                                                                                                  |
| 302 | Gal $\beta$ 1-4GlcNAc $\alpha$ 1-6Gal $\beta$ 1-4GlcNAc $\beta$ -Sp0                                                                                                                            |
| 303 | Gal $\beta$ 1-4GlcNAc $\beta$ 1-6Gal $\beta$ 1-4GlcNAc $\beta$ -Sp0                                                                                                                             |
| 304 | GalNAc $\beta$ 1-3Gal $\beta$ -Sp8                                                                                                                                                              |
| 305 | GlcA $\beta$ 1-3GlcNAc $\beta$ -Sp8                                                                                                                                                             |
| 306 | GlcNAc $\beta$ 1-2Man $\alpha$ 1-3(Neu5Ac $\alpha$ 2-6Gal $\beta$ 1-4GlcNAc $\beta$ 1-2Man $\alpha$ 1-6)Man $\beta$ 1-4GlcNAc $\beta$ 1-4GlcNAc $\beta$ -Sp12                                   |
| 307 | GlcNAc $\beta$ 1-3Man-Sp10                                                                                                                                                                      |
| 308 | GlcNAc $\beta$ 1-4GlcNAc $\beta$ -Sp10                                                                                                                                                          |
| 309 | GlcNAc $\beta$ 1-4GlcNAc $\beta$ -Sp12                                                                                                                                                          |
| 310 | HOOC(CH <sub>3</sub> )CH-3-O-GlcNAc $\beta$ 1-4GlcNAc $\beta$ -Sp10                                                                                                                             |
| 311 | Man $\alpha$ 1-6Man $\beta$ -Sp10                                                                                                                                                               |
| 312 | Man $\alpha$ 1-6(Man $\alpha$ 1-3)Man $\alpha$ 1-6(Man $\alpha$ 1-3)Man $\beta$ -Sp10                                                                                                           |
| 313 | Man $\alpha$ 1-2Man $\alpha$ 1-2Man $\alpha$ 1-3(Man $\alpha$ 1-2Man $\alpha$ 1-6(Man $\alpha$ 1-3)Man $\alpha$ 1-6)Man $\alpha$ -Sp9                                                           |
| 314 | Man $\alpha$ 1-2Man $\alpha$ 1-2Man $\alpha$ 1-3(Man $\alpha$ 1-2Man $\alpha$ 1-6(Man $\alpha$ 1-2Man $\alpha$ 1-3)Man $\alpha$ 1-6)Man $\alpha$ -Sp9                                           |
| 315 | Neu5Ac $\alpha$ 2-3Gal $\beta$ 1-3(Neu5Ac $\alpha$ 2-3Gal $\beta$ 1-4GlcNAc $\beta$ 1-6)GalNAc $\alpha$ -Sp14                                                                                   |
| 316 | Neu5Ac $\alpha$ 2-3Gal $\beta$ 1-4GlcNAc $\beta$ 1-2Man $\alpha$ 1-3(Neu5Ac $\alpha$ 2-6Gal $\beta$ 1-4GlcNAc $\beta$ 1-2Man $\alpha$ 1-6)Man $\beta$ 1-4GlcNAc $\beta$ 1-4GlcNAc $\beta$ -Sp12 |

|     |                                                                                                                                                                                                 |
|-----|-------------------------------------------------------------------------------------------------------------------------------------------------------------------------------------------------|
| 317 | Neu5Ac $\alpha$ 2-6Gal $\beta$ 1-4GlcNAc $\beta$ 1-2Man $\alpha$ 1-3(Gal $\beta$ 1-4GlcNAc $\beta$ 1-2Man $\alpha$ 1-6)Man $\beta$ 1-4GlcNAc $\beta$ 1-4GlcNAc $\beta$ -Sp12                    |
| 318 | Neu5Ac $\alpha$ 2-6Gal $\beta$ 1-4GlcNAc $\beta$ 1-2Man $\alpha$ 1-3(GlcNAc $\beta$ 1-2Man $\alpha$ 1-6)Man $\beta$ 1-4GlcNAc $\beta$ 1-4GlcNAc $\beta$ -Sp12                                   |
| 319 | Neu5Ac $\alpha$ 2-8Neu5Ac $\beta$ -Sp17                                                                                                                                                         |
| 320 | Neu5Ac $\alpha$ 2-8Neu5Ac $\alpha$ 2-8Neu5Ac $\beta$ -Sp8                                                                                                                                       |
| 321 | Neu5Gc $\beta$ 2-6Gal $\beta$ 1-4GlcNAc-Sp8                                                                                                                                                     |
| 322 | Gal $\beta$ 1-3GlcNAc $\beta$ 1-2Man $\alpha$ 1-3(Gal $\beta$ 1-3GlcNAc $\beta$ 1-2Man $\alpha$ 1-6)Man $\beta$ 1-4GlcNAc $\beta$ 1-4GlcNAc $\beta$ -Sp19                                       |
| 323 | Neu5Ac $\alpha$ 2-3Gal $\beta$ 1-4GlcNAc $\beta$ 1-2Man $\alpha$ 1-3(Neu5Ac $\alpha$ 2-3Gal $\beta$ 1-4GlcNAc $\beta$ 1-2Man $\alpha$ 1-6)Man $\beta$ 1-4GlcNAc $\beta$ 1-4GlcNAc $\beta$ -Sp12 |
| 324 | Neu5Ac $\alpha$ 2-6Gal $\beta$ 1-4GlcNAc $\beta$ 1-2Man $\alpha$ 1-3(Neu5Ac $\alpha$ 2-3Gal $\beta$ 1-4GlcNAc $\beta$ 1-2Man $\alpha$ 1-6)Man $\beta$ 1-4GlcNAc $\beta$ 1-4GlcNAc $\beta$ -Sp12 |
| 325 | Fuca1-3(Gal $\beta$ 1-4)GlcNAc $\beta$ 1-2Man $\alpha$ 1-3(Fuca1-3(Gal $\beta$ 1-4)GlcNAc $\beta$ 1-2Man $\alpha$ 1-6)Man $\beta$ 1-4GlcNAc $\beta$ 1-4GlcNAc $\beta$ -Sp20                     |
| 326 | Neu5Ac(9Ac)a2-3Gal $\beta$ 1-4GlcNAc $\beta$ -Sp0                                                                                                                                               |
| 327 | Neu5Ac(9Ac)a2-3Gal $\beta$ 1-3GlcNAc $\beta$ -Sp0                                                                                                                                               |
| 328 | Neu5Ac $\alpha$ 2-6Gal $\beta$ 1-4GlcNAc $\beta$ 1-3Gal $\beta$ 1-3GlcNAc $\beta$ -Sp0                                                                                                          |
| 329 | Neu5Ac $\alpha$ 2-3Gal $\beta$ 1-3(Fuca1-4)GlcNAc $\beta$ 1-3Gal $\beta$ 1-3(Fuca1-4)GlcNAc $\beta$ -Sp0                                                                                        |
| 330 | Neu5Ac $\alpha$ 2-6Gal $\beta$ 1-4GlcNAc $\beta$ 1-3Gal $\beta$ 1-4GlcNAc $\beta$ 1-3Gal $\beta$ 1-4GlcNAc $\beta$ -Sp0                                                                         |
| 331 | Gala1-4Gal $\beta$ 1-4GlcNAc $\beta$ 1-3Gal $\beta$ 1-4Glc $\beta$ -Sp0                                                                                                                         |
| 332 | GalNAc $\beta$ 1-3Gala1-4Gal $\beta$ 1-4GlcNAc $\beta$ 1-3Gal $\beta$ 1-4Glc $\beta$ -Sp0                                                                                                       |
| 333 | GalNAc $\alpha$ 1-3(Fuca1-2)Gal $\beta$ 1-4GlcNAc $\beta$ 1-3Gal $\beta$ 1-4GlcNAc $\beta$ -Sp0                                                                                                 |
| 334 | GalNAc $\alpha$ 1-3(Fuca1-2)Gal $\beta$ 1-4GlcNAc $\beta$ 1-3Gal $\beta$ 1-4GlcNAc $\beta$ 1-3Gal $\beta$ 1-4GlcNAc $\beta$ -Sp0                                                                |
| 335 | Neu5Ac $\alpha$ 2-3-Gal $\beta$ 1-3(Gal $\beta$ 1-4(Fuca1-3)GlcNAc $\beta$ 1-6)GalNAc-Sp14                                                                                                      |
| 336 | GlcNAc $\alpha$ 1-4Gal $\beta$ 1-4GlcNAc $\beta$ 1-3Gal $\beta$ 1-4GlcNAc $\beta$ 1-3Gal $\beta$ 1-4GlcNAc $\beta$ -Sp0                                                                         |
| 337 | GlcNAc $\alpha$ 1-4Gal $\beta$ 1-4GlcNAc $\beta$ -Sp0                                                                                                                                           |
| 338 | GlcNAc $\alpha$ 1-4Gal $\beta$ 1-3GlcNAc $\beta$ -Sp0                                                                                                                                           |
| 339 | GlcNAc $\alpha$ 1-4Gal $\beta$ 1-4GlcNAc $\beta$ 1-3Gal $\beta$ 1-4Glc $\beta$ -Sp0                                                                                                             |
| 340 | GlcNAc $\alpha$ 1-4Gal $\beta$ 1-4GlcNAc $\beta$ 1-3Gal $\beta$ 1-4(Fuca1-3)GlcNAc $\beta$ 1-3Gal $\beta$ 1-4(Fuca1-3)GlcNAc $\beta$ -Sp0                                                       |
| 341 | GlcNAc $\alpha$ 1-4Gal $\beta$ 1-4GlcNAc $\beta$ 1-3Gal $\beta$ 1-4GlcNAc $\beta$ -Sp0                                                                                                          |
| 342 | GlcNAc $\alpha$ 1-4Gal $\beta$ 1-3GalNAc-Sp14                                                                                                                                                   |
| 343 | Man $\alpha$ 1-3(Neu5Ac $\alpha$ 2-6Gal $\beta$ 1-4GlcNAc $\beta$ 1-2Man $\alpha$ 1-6)Man $\beta$ 1-4GlcNAc $\beta$ 1-4GlcNAc-Sp12                                                              |
| 344 | Neu5Ac $\alpha$ 2-6Gal $\beta$ 1-4GlcNAc $\beta$ 1-2Man $\alpha$ 1-3(Man $\alpha$ 1-6)Man $\beta$ 1-4GlcNAc $\beta$ 1-4GlcNAc-Sp12                                                              |
| 345 | Neu5Ac $\alpha$ 2-6Gal $\beta$ 1-4GlcNAc $\beta$ 1-2Man $\alpha$ 1-6Man $\beta$ 1-4GlcNAc $\beta$ 1-4GlcNAc-Sp12                                                                                |
| 346 | Neu5Ac $\alpha$ 2-6Gal $\beta$ 1-4GlcNAc $\beta$ 1-2Man $\alpha$ 1-3Man $\beta$ 1-4GlcNAc $\beta$ 1-4GlcNAc-Sp12                                                                                |
| 347 | Gal $\beta$ 1-4GlcNAc $\beta$ 1-2Man $\alpha$ 1-3Man $\beta$ 1-4GlcNAc $\beta$ 1-4GlcNAc-Sp12                                                                                                   |
| 348 | Gal $\beta$ 1-4GlcNAc $\beta$ 1-2Man $\alpha$ 1-6Man $\beta$ 1-4GlcNAc $\beta$ 1-4GlcNAc-Sp12                                                                                                   |
| 349 | Gal $\beta$ 1-4GlcNAc $\beta$ 1-2Man $\alpha$ 1-3(Man $\alpha$ 1-6)Man $\beta$ 1-4GlcNAc $\beta$ 1-4GlcNAc $\beta$ -Sp12                                                                        |
| 350 | GlcNAc $\beta$ 1-2Man $\alpha$ 1-3(GlcNAc $\beta$ 1-2Man $\alpha$ 1-6)Man $\beta$ 1-4GlcNAc $\beta$ 1-4(Fuca1-6)GlcNAc $\beta$ -Sp22                                                            |
| 351 | Gal $\beta$ 1-4GlcNAc $\beta$ 1-2Man $\alpha$ 1-3(Gal $\beta$ 1-4GlcNAc $\beta$ 1-2Man $\alpha$ 1-6)Man $\beta$ 1-4GlcNAc $\beta$ 1-4(Fuca1-6)GlcNAc $\beta$ -Sp22                              |
| 352 | Gal $\beta$ 1-3GlcNAc $\beta$ 1-2Man $\alpha$ 1-3(Gal $\beta$ 1-3GlcNAc $\beta$ 1-2Man $\alpha$ 1-6)Man $\beta$ 1-4GlcNAc $\beta$ 1-4(Fuca1-6)GlcNAc $\beta$ -Sp22                              |
| 353 | Gal $\beta$ 1-3(Fuca1-4)GlcNAc $\beta$ 1-2Man $\alpha$ 1-3(Gal $\beta$ 1-3(Fuca1-4)GlcNAc $\beta$ 1-2Man $\alpha$ 1-6)Man $\beta$ 1-4GlcNAc $\beta$ 1-4GlcNAc $\beta$ -Sp19                     |
| 354 | [6OSO3]GlcNAc $\beta$ 1-3Gal $\beta$ 1-4GlcNAc $\beta$ -Sp0                                                                                                                                     |
| 355 | KDN $\alpha$ 2-3Gal $\beta$ 1-4(Fuca1-3)GlcNAc-Sp0                                                                                                                                              |

|     |                                                                                                                                                                                                                                 |
|-----|---------------------------------------------------------------------------------------------------------------------------------------------------------------------------------------------------------------------------------|
| 356 | KDN $\alpha$ 2-6Gal $\beta$ 1-4GlcNAc-Sp0                                                                                                                                                                                       |
| 357 | KDN $\alpha$ 2-3Gal $\beta$ 1-4Glc-Sp0                                                                                                                                                                                          |
| 358 | KDN $\alpha$ 2-3Gal $\beta$ 1-3GalNAc $\alpha$ -Sp14                                                                                                                                                                            |
| 359 | Fuca1-2Gal $\beta$ 1-3GlcNAc $\beta$ 1-2Man $\alpha$ 1-3(Fuca1-2Gal $\beta$ 1-3GlcNAc $\beta$ 1-2Man $\alpha$ 1-6)Man $\beta$ 1-4GlcNAc $\beta$ 1-4GlcNAc $\beta$ -Sp20                                                         |
| 360 | Fuca1-2Gal $\beta$ 1-4GlcNAc $\beta$ 1-2Man $\alpha$ 1-3(Fuca1-2Gal $\beta$ 1-4GlcNAc $\beta$ 1-2Man $\alpha$ 1-6)Man $\beta$ 1-4GlcNAc $\beta$ 1-4GlcNAc $\beta$ -Sp20                                                         |
| 361 | Fuca1-2Gal $\beta$ 1-4(Fuca1-3)GlcNAc $\beta$ 1-2Man $\alpha$ 1-3(Fuca1-2Gal $\beta$ 1-4(Fuca1-3)GlcNAc $\beta$ 1-2Man $\alpha$ 1-6)Man $\beta$ 1-4GlcNAc $\beta$ 1-4GlcNAc $\beta$ -Sp20                                       |
| 362 | Gal $\alpha$ 1-3Gal $\beta$ 1-4GlcNAc $\beta$ 1-2Man $\alpha$ 1-3(Gal $\alpha$ 1-3Gal $\beta$ 1-4GlcNAc $\beta$ 1-2Man $\alpha$ 1-6)Man $\beta$ 1-4GlcNAc $\beta$ 1-4GlcNAc $\beta$ -Sp20                                       |
| 363 | Man $\alpha$ 1-3(Gal $\beta$ 1-4GlcNAc $\beta$ 1-2Man $\alpha$ 1-6)Man $\beta$ 1-4GlcNAc $\beta$ 1-4GlcNAc $\beta$ -Sp12                                                                                                        |
| 364 | Gal $\beta$ 1-3(Fuca1-4)GlcNAc $\beta$ 1-2Man $\alpha$ 1-3(Gal $\beta$ 1-3(Fuca1-4)GlcNAc $\beta$ 1-2Man $\alpha$ 1-6)Man $\beta$ 1-4GlcNAc $\beta$ 1-4(Fuca1-6)GlcNAc $\beta$ -Sp22                                            |
| 365 | Neu5Ac $\alpha$ 2-6GlcNAc $\beta$ 1-4GlcNAc-Sp21                                                                                                                                                                                |
| 366 | Neu5Ac $\alpha$ 2-6GlcNAc $\beta$ 1-4GlcNAc $\beta$ 1-4GlcNAc-Sp21                                                                                                                                                              |
| 367 | Fuca1-2Gal $\beta$ 1-3GlcNAc $\beta$ 1-3(Gal $\beta$ 1-4(Fuca1-3)GlcNAc $\beta$ 1-6)Gal $\beta$ 1-4Glc-Sp21                                                                                                                     |
| 368 | Gal $\beta$ 1-4GlcNAc $\beta$ 1-2(Gal $\beta$ 1-4GlcNAc $\beta$ 1-4)Man $\alpha$ 1-3(Gal $\beta$ 1-4GlcNAc $\beta$ 1-2Man $\alpha$ 1-6)Man $\beta$ 1-4GlcNAc $\beta$ 1-4GlcNAc-Sp21                                             |
| 369 | GalNAc $\alpha$ 1-3(Fuca1-2)Gal $\beta$ 1-4GlcNAc $\beta$ 1-2Man $\alpha$ 1-3(GalNAc $\alpha$ 1-3(Fuca1-2)Gal $\beta$ 1-4GlcNAc $\beta$ 1-2Man $\alpha$ 1-6)Man $\beta$ 1-4GlcNAc $\beta$ 1-4GlcNAc $\beta$ -Sp20               |
| 370 | Gal $\alpha$ 1-3(Fuca1-2)Gal $\beta$ 1-4GlcNAc $\beta$ 1-2Man $\alpha$ 1-3(Gal $\alpha$ 1-3(Fuca1-2)Gal $\beta$ 1-4GlcNAc $\beta$ 1-2Man $\alpha$ 1-6)Man $\beta$ 1-4GlcNAc $\beta$ 1-4GlcNAc $\beta$ -Sp20                     |
| 371 | Gal $\alpha$ 1-3Gal $\beta$ 1-4(Fuca1-3)GlcNAc $\beta$ 1-2Man $\alpha$ 1-3(Gal $\alpha$ 1-3Gal $\beta$ 1-4(Fuca1-3)GlcNAc $\beta$ 1-2Man $\alpha$ 1-6)Man $\beta$ 1-4GlcNAc $\beta$ 1-4GlcNAc $\beta$ -Sp20                     |
| 372 | GalNAc $\alpha$ 1-3(Fuca1-2)Gal $\beta$ 1-3GlcNAc $\beta$ 1-2Man $\alpha$ 1-3(GalNAc $\alpha$ 1-3(Fuca1-2)Gal $\beta$ 1-3GlcNAc $\beta$ 1-2Man $\alpha$ 1-6)Man $\beta$ 1-4GlcNAc $\beta$ 1-4GlcNAc $\beta$ -Sp20               |
| 373 | Gal $\alpha$ 1-3(Fuca1-2)Gal $\beta$ 1-3GlcNAc $\beta$ 1-2Man $\alpha$ 1-3(Gal $\alpha$ 1-3(Fuca1-2)Gal $\beta$ 1-3GlcNAc $\beta$ 1-2Man $\alpha$ 1-6)Man $\beta$ 1-4GlcNAc $\beta$ 1-4GlcNAc $\beta$ -Sp20                     |
| 374 | Fuca1-2Gal $\beta$ 1-3(Fuca1-4)GlcNAc $\beta$ 1-2Man $\alpha$ 1-3(Fuca1-2Gal $\beta$ 1-3(Fuca1-4)GlcNAc $\beta$ 1-2Man $\alpha$ 1-6)Man $\beta$ 1-4GlcNAc $\beta$ 1-4GlcNAc $\beta$ -Sp19                                       |
| 375 | Neu5Ac $\alpha$ 2-3Gal $\beta$ 1-4GlcNAc $\beta$ 1-3GalNAc-Sp14                                                                                                                                                                 |
| 376 | Neu5Ac $\alpha$ 2-6Gal $\beta$ 1-4GlcNAc $\beta$ 1-3GalNAc-Sp14                                                                                                                                                                 |
| 377 | Neu5Ac $\alpha$ 2-3Gal $\beta$ 1-4(Fuca1-3)GlcNAc $\beta$ 1-3GalNAc $\alpha$ -Sp14                                                                                                                                              |
| 378 | (GalNAc $\beta$ 1-4GlcNAc $\beta$ 1-2Man $\alpha$ 1-6)GalNAc $\beta$ 1-4GlcNAc $\beta$ 1-2Man $\alpha$ 1-3Man $\beta$ 1-4GlcNAc $\beta$ 1-4GlcNAc-Sp12                                                                          |
| 379 | Gal $\beta$ 1-3GalNAc $\alpha$ 1-3(Fuca1-2)Gal $\beta$ 1-4Glc-Sp0                                                                                                                                                               |
| 380 | Gal $\beta$ 1-3GalNAc $\alpha$ 1-3(Fuca1-2)Gal $\beta$ 1-4GlcNAc-Sp0                                                                                                                                                            |
| 381 | Gal $\beta$ 1-3GlcNAc $\beta$ 1-3(Gal $\beta$ 1-3GlcNAc $\beta$ 1-3Gal $\beta$ 1-4GlcNAc $\beta$ 1-6)Gal $\beta$ 1-4Glc $\beta$ -Sp0                                                                                            |
| 382 | Gal $\beta$ 1-3GlcNAc $\beta$ 1-3(Gal $\beta$ 1-4(Fuca1-3)GlcNAc $\beta$ 1-6)Gal $\beta$ 1-4Glc-Sp21                                                                                                                            |
| 383 | Fuca1-2Gal $\beta$ 1-3(Fuca1-4)GlcNAc $\beta$ 1-3(Gal $\beta$ 1-4GlcNAc $\beta$ 1-6)Gal $\beta$ 1-4Glc-Sp21                                                                                                                     |
| 384 | Fuca1-2Gal $\beta$ 1-3(Fuca1-4)GlcNAc $\beta$ 1-3(Gal $\beta$ 1-4(Fuca1-3)GlcNAc $\beta$ 1-6)Gal $\beta$ 1-4Glc-Sp21                                                                                                            |
| 385 | Gal $\beta$ 1-3GlcNAc $\beta$ 1-3(Gal $\beta$ 1-3GlcNAc $\beta$ 1-3Gal $\beta$ 1-4(Fuca1-3)GlcNAc $\beta$ 1-6)Gal $\beta$ 1-4Glc-Sp21                                                                                           |
| 386 | Gal $\beta$ 1-4GlcNAc $\beta$ 1-2(Gal $\beta$ 1-4GlcNAc $\beta$ 1-4)Man $\alpha$ 1-3(Gal $\beta$ 1-4GlcNAc $\beta$ 1-2(Gal $\beta$ 1-4GlcNAc $\beta$ 1-6)Man $\alpha$ 1-6)Man $\beta$ 1-4GlcNAc $\beta$ 1-4GlcNAc $\beta$ -Sp21 |
| 387 | GlcNAc $\beta$ 1-2(GlcNAc $\beta$ 1-4)Man $\alpha$ 1-3(GlcNAc $\beta$ 1-2Man $\alpha$ 1-6)Man $\beta$ 1-4GlcNAc $\beta$ 1-4GlcNAc-Sp21                                                                                          |
| 388 | Fuca1-2Gal $\beta$ 1-3GalNAc $\alpha$ 1-3(Fuca1-2)Gal $\beta$ 1-4Glc $\beta$ -Sp0                                                                                                                                               |
| 389 | Fuca1-2Gal $\beta$ 1-3GalNAc $\alpha$ 1-3(Fuca1-2)Gal $\beta$ 1-4GlcNAc $\beta$ -Sp0                                                                                                                                            |
| 390 | Gal $\beta$ 1-3GlcNAc $\beta$ 1-3GalNAc $\alpha$ -Sp14                                                                                                                                                                          |
| 391 | Neu5Ac $\alpha$ 2-3(GalNAc $\beta$ 1-4)Gal $\beta$ 1-4GlcNAc $\beta$ 1-3GalNAc $\alpha$ -Sp14                                                                                                                                   |
| 392 | GalNAc $\alpha$ 1-3(Fuca1-2)Gal $\beta$ 1-3GalNAc $\alpha$ 1-3(Fuca1-2)Gal $\beta$ 1-4GlcNAc $\beta$ -Sp0                                                                                                                       |

|     |                                                                                                                                                                                                                      |
|-----|----------------------------------------------------------------------------------------------------------------------------------------------------------------------------------------------------------------------|
| 393 | Gal $\alpha$ 1-3Gal $\beta$ 1-3GlcNAc $\beta$ 1-2Man $\alpha$ 1-3(Gal $\alpha$ 1-3Gal $\beta$ 1-3GlcNAc $\beta$ 1-2Man $\alpha$ 1-6)Man $\beta$ 1-4GlcNAc $\beta$ 1-4GlcNAc-Sp19                                     |
| 394 | Gal $\alpha$ 1-3Gal $\beta$ 1-3(Fuca1-4)GlcNAc $\beta$ 1-2Man $\alpha$ 1-3(Gal $\alpha$ 1-3Gal $\beta$ 1-3(Fuca1-4)GlcNAc $\beta$ 1-2Man $\alpha$ 1-6)Man $\beta$ 1-4GlcNAc $\beta$ 1-4GlcNAc-Sp19                   |
| 395 | Gal $\beta$ 1-4GlcNAc $\beta$ 1-2Man $\alpha$ 1-3(GlcNAc $\beta$ 1-2Man $\alpha$ 1-6)Man $\beta$ 1-4GlcNAc $\beta$ 1-4GlcNAc-Sp12                                                                                    |
| 396 | GlcNAc $\beta$ 1-2Man $\alpha$ 1-3(Gal $\beta$ 1-4GlcNAc $\beta$ 1-2Man $\alpha$ 1-6)Man $\beta$ 1-4GlcNAc $\beta$ 1-4GlcNAc-Sp12                                                                                    |
| 397 | Neu5Ac $\alpha$ 2-3Gal $\beta$ 1-3GlcNAc $\beta$ 1-3GalNAc $\alpha$ -Sp14                                                                                                                                            |
| 398 | Fuca1-2Gal $\beta$ 1-4GlcNAc $\beta$ 1-3GalNAc $\alpha$ -Sp14                                                                                                                                                        |
| 399 | Gal $\beta$ 1-4(Fuca1-3)GlcNAc $\beta$ 1-3GalNAc $\alpha$ -Sp14                                                                                                                                                      |
| 400 | GalNAc $\alpha$ 1-3GalNAc $\beta$ 1-3Gal $\alpha$ 1-4Gal $\beta$ 1-4GlcNAc $\beta$ -Sp0                                                                                                                              |
| 401 | Gal $\alpha$ 1-4Gal $\beta$ 1-3GlcNAc $\beta$ 1-2Man $\alpha$ 1-3(Gal $\alpha$ 1-4Gal $\beta$ 1-3GlcNAc $\beta$ 1-2Man $\alpha$ 1-6)Man $\beta$ 1-4GlcNAc $\beta$ 1-4GlcNAc $\beta$ -Sp19                            |
| 402 | Gal $\alpha$ 1-4Gal $\beta$ 1-4GlcNAc $\beta$ 1-2Man $\alpha$ 1-3(Gal $\alpha$ 1-4Gal $\beta$ 1-4GlcNAc $\beta$ 1-2Man $\alpha$ 1-6)Man $\beta$ 1-4GlcNAc $\beta$ 1-4GlcNAc $\beta$ -LVANKT                          |
| 403 | Gal $\alpha$ 1-3Gal $\beta$ 1-4GlcNAc $\beta$ 1-3GalNAc $\alpha$ -Sp14                                                                                                                                               |
| 404 | Gal $\beta$ 1-3GlcNAc $\beta$ 1-6Gal $\beta$ 1-4GlcNAc $\beta$ -Sp0                                                                                                                                                  |
| 405 | Gal $\beta$ 1-3GlcNAc $\alpha$ 1-6Gal $\beta$ 1-4GlcNAc $\beta$ -Sp0                                                                                                                                                 |
| 406 | GalNAc $\beta$ 1-3Gal $\alpha$ 1-6Gal $\beta$ 1-4Glc $\beta$ -Sp8                                                                                                                                                    |
| 407 | GlcNAc $\beta$ 1-6(GlcNAc $\beta$ 1-3)GalNAc $\alpha$ -Sp14                                                                                                                                                          |
| 408 | Gal $\alpha$ 1-3(Fuca1-2)Gal $\beta$ 1-4(Fuca1-3)Glc $\beta$ -Sp21                                                                                                                                                   |
| 409 | Neu5Ac $\alpha$ 2-6Gal $\beta$ 1-3GlcNAc $\beta$ 1-3(Gal $\beta$ 1-4GlcNAc $\beta$ 1-6)Gal $\beta$ 1-4Glc-Sp21                                                                                                       |
| 410 | Gal $\beta$ 1-3GalNAc $\beta$ 1-4(Neu5Ac $\alpha$ 2-8Neu5Ac $\alpha$ 2-3)Gal $\beta$ 1-4Glc $\beta$ -Sp0                                                                                                             |
| 411 | Neu5Ac $\alpha$ 2-3Gal $\beta$ 1-3GalNAc $\beta$ 1-4(Neu5Ac $\alpha$ 2-8Neu5Ac $\alpha$ 2-3)Gal $\beta$ 1-4Glc $\beta$ -Sp0                                                                                          |
| 412 | Gal $\alpha$ 1-3(Fuca1-2)Gal $\beta$ 1-4GlcNAc $\beta$ 1-3GalNAc $\alpha$ -Sp14                                                                                                                                      |
| 413 | GalNAc $\alpha$ 1-3(Fuca1-2)Gal $\beta$ 1-4GlcNAc $\beta$ 1-3GalNAc $\alpha$ -Sp14                                                                                                                                   |
| 414 | GalNAc $\alpha$ 1-3GalNAc $\beta$ 1-3Gal $\alpha$ 1-4Gal $\beta$ 1-4Glc $\beta$ -Sp0                                                                                                                                 |
| 415 | Fuca1-2Gal $\beta$ 1-4(Fuca1-3)GlcNAc $\beta$ 1-3GalNAc $\alpha$ -Sp14                                                                                                                                               |
| 416 | Gal $\alpha$ 1-3(Fuca1-2)Gal $\beta$ 1-4(Fuca1-3)GlcNAc $\beta$ 1-3GalNAc-Sp14                                                                                                                                       |
| 417 | GalNAc $\alpha$ 1-3(Fuca1-2)Gal $\beta$ 1-4(Fuca1-3)GlcNAc $\beta$ 1-3GalNAc-Sp14                                                                                                                                    |
| 418 | Gal $\beta$ 1-4(Fuca1-3)GlcNAc $\beta$ 1-2Man $\alpha$ 1-3(Gal $\beta$ 1-4(Fuca1-3)GlcNAc $\beta$ 1-2Man $\alpha$ 1-6)Man $\beta$ 1-4GlcNAc $\beta$ 1-4(Fuca1-6)GlcNAc $\beta$ -Sp22                                 |
| 419 | Fuca1-2Gal $\beta$ 1-4GlcNAc $\beta$ 1-2Man $\alpha$ 1-3(Fuca1-2Gal $\beta$ 1-4GlcNAc $\beta$ 1-2Man $\alpha$ 1-6)Man $\beta$ 1-4GlcNAc $\beta$ 1-4(Fuca1-6)GlcNAc $\beta$ -Sp22                                     |
| 420 | GlcNAc $\beta$ 1-2Man $\alpha$ 1-3(GlcNAc $\beta$ 1-2(GlcNAc $\beta$ 1-6)Man $\alpha$ 1-6)Man $\beta$ 1-4GlcNAc $\beta$ 1-4GlcNAc $\beta$ -Sp19                                                                      |
| 421 | Fuca1-2Gal $\beta$ 1-3GlcNAc $\beta$ 1-3GalNAc-Sp14                                                                                                                                                                  |
| 422 | Gal $\alpha$ 1-3(Fuca1-2)Gal $\beta$ 1-3GlcNAc $\beta$ 1-3GalNAc-Sp14                                                                                                                                                |
| 423 | GalNAc $\alpha$ 1-3(Fuca1-2)Gal $\beta$ 1-3GlcNAc $\beta$ 1-3GalNAc-Sp14                                                                                                                                             |
| 424 | Gal $\alpha$ 1-3Gal $\beta$ 1-3GlcNAc $\beta$ 1-3GalNAc-Sp14                                                                                                                                                         |
| 425 | Fuca1-2Gal $\beta$ 1-3GlcNAc $\beta$ 1-2Man $\alpha$ 1-3(Fuca1-2Gal $\beta$ 1-3GlcNAc $\beta$ 1-2Man $\alpha$ 1-6)Man $\beta$ 1-4GlcNAc $\beta$ 1-4(Fuca1-6)GlcNAc $\beta$ -Sp22                                     |
| 426 | Gal $\alpha$ 1-3(Fuca1-2)Gal $\beta$ 1-4GlcNAc $\beta$ 1-2Man $\alpha$ 1-3(Gal $\alpha$ 1-3(Fuca1-2)Gal $\beta$ 1-4GlcNAc $\beta$ 1-2Man $\alpha$ 1-6)Man $\beta$ 1-4GlcNAc $\beta$ 1-4(Fuca1-6)GlcNAc $\beta$ -Sp22 |
| 427 | Gal $\beta$ 1-3GlcNAc $\beta$ 1-2Man $\alpha$ 1-3(Gal $\beta$ 1-3GlcNAc $\beta$ 1-2(Gal $\beta$ 1-3GlcNAc $\beta$ 1-6)Man $\alpha$ 1-6)Man $\beta$ 1-4GlcNAc $\beta$ 1-4GlcNAc $\beta$ -Sp19                         |
| 428 | Fuca1-2Gal $\beta$ 1-3GlcNAc $\beta$ 1-3(Gal $\beta$ 1-4GlcNAc $\beta$ 1-6)Gal $\beta$ 1-4Glc-Sp21                                                                                                                   |
| 429 | Gal $\beta$ 1-4GlcNAc $\beta$ 1-3Gal $\beta$ 1-4(Fuca1-3GlcNAc $\beta$ 1-6)Gal $\beta$ 1-4Glc-Sp21                                                                                                                   |
| 430 | GlcNAc $\beta$ 1-2Man $\alpha$ 1-3(GlcNAc $\beta$ 1-4)(GlcNAc $\beta$ 1-2Man $\alpha$ 1-6)Man $\beta$ 1-4GlcNAc $\beta$ 1-4GlcNAc-Sp21                                                                               |
| 431 | GlcNAc $\beta$ 1-4(GlcNAc $\beta$ 1-2)Man $\alpha$ 1-3(GlcNAc $\beta$ 1-4)(GlcNAc $\beta$ 1-2Man $\alpha$ 1-6)Man $\beta$ 1-4GlcNAc $\beta$ 1-4GlcNAc-Sp21                                                           |
| 432 | GlcNAc $\beta$ 1-2Man $\alpha$ 1-3(GlcNAc $\beta$ 1-4)(GlcNAc $\beta$ 1-6(GlcNAc $\beta$ 1-2)Man $\alpha$ 1-6)Man $\beta$ 1-                                                                                         |

|     |                                                                                                                                                    |
|-----|----------------------------------------------------------------------------------------------------------------------------------------------------|
|     | 4GlcNAcβ1-4GlcNAc-Sp21                                                                                                                             |
| 433 | GlcNAcβ1-4(GlcNAcβ1-2)Manα1-3(GlcNAcβ1-4)(GlcNAcβ1-6(GlcNAcβ1-2)Manα1-6)Manβ1-4GlcNAcβ1-4GlcNAc-Sp21                                               |
| 434 | Galβ1-4GlcNAcβ1-2Manα1-3(GlcNAcβ1-4)(Galβ1-4GlcNAcβ1-2)Manβ1-4GlcNAcβ1-4GlcNAc-Sp21                                                                |
| 435 | Galβ1-4GlcNAcβ1-4(Galβ1-4GlcNAcβ1-2)Manα1-3(GlcNAcβ1-4)(Galβ1-4GlcNAcβ1-2Manα1-6)Manβ1-4GlcNAcβ1-4GlcNAc-Sp21                                      |
| 436 | Galβ1-4GlcNAcβ1-2Manα1-3(GlcNAcβ1-4)(Galβ1-4GlcNAcβ1-6(Galβ1-4GlcNAcβ1-2)Manα1-6)Manβ1-4GlcNAcβ1-4GlcNAc-Sp21                                      |
| 437 | Galβ1-4GlcNAcβ1-4(Galβ1-4GlcNAcβ1-2)Manα1-3(GlcNAcβ1-4)(Galβ1-4GlcNAcβ1-6(Galβ1-4-GlcNAcβ1-2)Manα1-6)Manβ1-4GlcNAcβ1-4GlcNAc-Sp21                  |
| 438 | Galα1-3Galβ1-4Glc-Sp10                                                                                                                             |
| 439 | Galβ1-4Galβ-Sp10                                                                                                                                   |
| 440 | Galβ1-6Galβ-Sp10                                                                                                                                   |
| 441 | Neu5Aca2-3Galβ1-4GlcNAcβ1-3Galβ-Sp8                                                                                                                |
| 442 | GalNAcβ1-6GalNAcβ-Sp8                                                                                                                              |
| 443 | [6OSO3]Galβ1-3GlcNAcβ-Sp0                                                                                                                          |
| 444 | [6OSO3]Galβ1-3[6OSO3]GlcNAc-Sp0                                                                                                                    |
| 445 | Fuca1-2Galβ1-4GlcNAcβ1-2(Fuca1-2Galβ1-4GlcNAcβ1-4)Manα1-3(Fuca1-2Galβ1-4GlcNAcβ1-2Manα1-6)Manβ1-4GlcNAcβ1-4GlcNAcβ-Sp12                            |
| 446 | Fuca1-2Galβ1-4(Fuca1-3)GlcNAcβ1-2(Fuca1-2Galβ1-4(Fuca1-3)GlcNAcβ1-4)Manα1-3(Fuca1-2Galβ1-4(Fuca1-3)GlcNAcβ1-2Manα1-6)Manβ1-4GlcNAcβ1-4GlcNAcβ-Sp12 |
| 447 | Galβ1-4GlcNAcβ1-3(Galβ1-4GlcNAcβ1-6)GalNAc-Sp14                                                                                                    |
| 448 | Galβ1-4GlcNAcβ1-6GalNAc-Sp14                                                                                                                       |
| 449 | Galβ1-4(Fuca1-3)GlcNAcβ1-6GalNAc-Sp14                                                                                                              |
| 450 | Galβ1-4GlcNAcβ1-2Manα-Sp0                                                                                                                          |
| 451 | Fuca1-2Galβ1-4GlcNAcβ1-3(Fuca1-2Galβ1-4GlcNAcβ1-6)GalNAc-Sp14                                                                                      |
| 452 | Galα1-3Fuca1-2Galβ1-4GlcNAcβ1-3(Galα1-3Fuca1-2Galβ1-4GlcNAcβ1-6)GalNAc-Sp14                                                                        |
| 453 | GalNAca1-3Fuca1-2Galβ1-4GlcNAcβ1-3(GalNAca1-3Fuca1-2Galβ1-4GlcNAcβ1-6)GalNAc-Sp14                                                                  |
| 454 | Neu5Aca2-8Neu5Aca2-3Galβ1-3GalNAcb1-4(Neu5Aca2-8Neu5Aca2-3)Galβ1-4Glc-Sp0                                                                          |
| 455 | GalNAcβ1-4Galβ1-4Glc-b-sp0                                                                                                                         |
| 456 | GalNAca1-3(Fuca1-2)Galβ1-4GlcNAcβ1-2Manα1-6(GalNAca1-3(Fuca1-2)Galβ1-4GlcNAcβ1-2Manα1-3)Manβ1-4GlcNAcβ1-4(Fuca1-6)GlcNAcβ-Sp22                     |
| 457 | Galα1-3(Fuca1-2)Galβ1-3GlcNAcβ1-2Manα1-6(Galα1-3(Fuca1-2)Galβ1-3GlcNAcβ1-2Manα1-3)Manβ1-4GlcNAcβ1-4(Fuca1-6)GlcNAcβ-Sp22                           |
| 458 | Neu5Aca2-6Galβ1-4GlcNAcβ1-6(Fuca1-2Galβ1-3GlcNAcβ1-3)Galβ-4Glc-Sp21                                                                                |
| 459 | GalNAca1-3(Fuca1-2)Galβ1-3GlcNAcβ1-2Manα1-6(GalNAca1-3(Fuca1-2)Galβ1-3GlcNAcβ1-2Manα1-3)Manβ1-4GlcNAcβ1-4(Fuca1-6)GlcNAcβ-Sp22                     |
| 460 | Galβ1-4GlcNAcβ1-6(Galβ1-4GlcNAcβ1-2)Manα1-6(Galβ1-4GlcNAcβ1-2Manα1-3)Manβ1-4GlcNAcβ1-4GlcNAcβ-Sp19                                                 |
| 461 | Galβ1-4GlcNAcβ-(OCH <sub>2</sub> CH <sub>2</sub> ) <sub>6</sub> NH <sub>2</sub>                                                                    |
| 462 | Galα1-3(Fuca1-2)Galβ1-3GalNAca-Sp8                                                                                                                 |
| 463 | Galα1-3(Fuca1-2)Galβ1-3GalNAcb-Sp8                                                                                                                 |
| 464 | Glcα1-6Glcα1-6Glcα1-6Glcβ-Sp10                                                                                                                     |
| 465 | Glcα1-4Glcα1-4Glcα1-4Glcβ-Sp10                                                                                                                     |



**Supplementary Table 1** List of glycans tested in glycoarray experiment.

Supplementary Table 2.

|                          |            | AutoRg (PRIMUS) |   |       | AutoRg (cmd line) |   |       | Guinier Region |   |       | Average of Methods |   |       |
|--------------------------|------------|-----------------|---|-------|-------------------|---|-------|----------------|---|-------|--------------------|---|-------|
| Concentration (in mg/mL) | Exposure # | Rg (in Å)       | ± | error | Rg (in Å)         | ± | error | Rg (in Å)      | ± | error | Rg (in Å)          | ± | error |
| 5.3                      | 1          | 29              | ± | 2     | 29                | ± | 4     | 27.8           | ± | 0.4   | 29                 | ± | 2     |
|                          | 2          | 28.2            | ± | 0.4   | 28                | ± | 3     | 27.6           | ± | 0.4   | 28                 | ± | 1.2   |
| 2.7                      | 1          | 27.9            | ± | 0.2   | 28                | ± | 3     | 27.9           | ± | 0.6   | 28                 | ± | 1     |
|                          | 2          | 28.5            | ± | 0.1   | 28                | ± | 4     | 28.1           | ± | 0.6   | 28                 | ± | 2     |
| 1.3                      | 1          | 28.2            | ± | 0.9   | 30                | ± | 10    | 29             | ± | 1     | 28                 | ± | 5     |
|                          | 2          | 20              | ± | 10    | 20                | ± | 20    | 29             | ± | 1     | 30                 | ± | 10    |

---

**Supplementary Table 2** Comparison of estimated radius of gyration for successive exposures for each concentration via different methods within the ATSAS package.
